# Supplementary material
Source: PubMed Central journal article supplement (PMC4123302)
Supplement: cr201494x4.pdf [file cr201494x4.pdf]

**Figure S4**

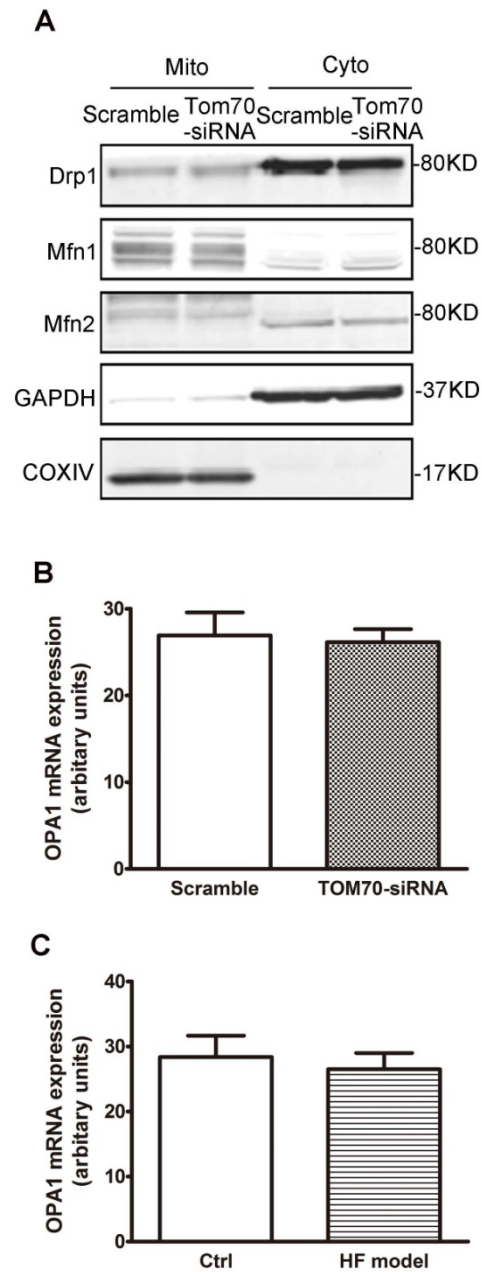

**Supplementary information, Figure S4** Effects of Tom70 knockdown on mitochondria-shaping protein expression. **(A)** Immunoblotting analysis of Drp1 and Mfn1/2 in NRVMs. The reduction in Tom70 expression did not affect the cytosolic or mitochondrial levels. **(B)** and **(C)** Opa1 mRNA expression analysis of Tom70-deficient NRVMs and ISO-induced hypertrophic rat myocardium. The data were obtained from three separate experiments.
